# Supplementary material for: Aqueous broadband photopolymerization on microreactor arrays: from high throughput polymerization to fabricating artificial cells
Source: Royal Society of Chemistry journal article supplement (doi:10.1039/d1py01534f), 2021-12-28
Supplement: d1py01534f1.pdf [file d1py01534f1.pdf]

## Aqueous Broadband Photopolymerization on Microreactor Arrays: from High Throughput Polymerization to Fabricating Artificial cells

Yue Zhou, Chuan Gu, Lifang Zheng, Fangjian Shan, and Gaojian Chen\*

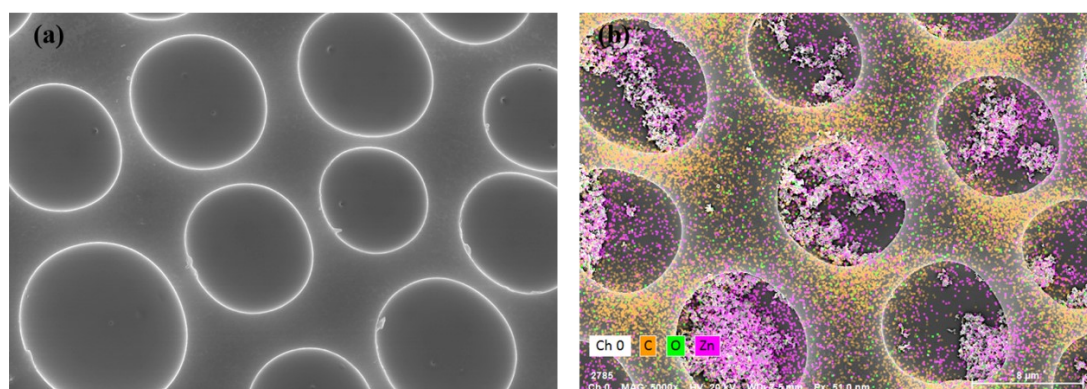

**Fig. S1** (a) SEM image of honeycomb-structured film without ZnO nanoparticles; (b) The SEM and element analysis of ZnO microreactors.

**Table S1** The results of RAFT polymerization of PEGMEMA for 6 hours using different amounts of ZnO.

|                                       | 0mg   | 0.5mg | 1mg   | 1.5mg | 2mg   | 2.5mg | 3mg   |
|---------------------------------------|-------|-------|-------|-------|-------|-------|-------|
| Conv. <sup>a</sup> (%)                | 30    | 24.5  | 29.5  | 37    | 42    | 45    | 46    |
| $M_{n, GPC}^b$ (g mol <sup>-1</sup> ) | 41500 | 33700 | 33300 | 50000 | 56400 | 66300 | 70200 |
| $M_w/M_n^b$                           | 2.27  | 1.83  | 1.87  | 1.67  | 1.50  | 1.48  | 1.45  |

<sup>a</sup> Calculated by gravimetry.

<sup>b</sup> Measured by GPC using N, N-dimethylformamide (DMF) as a fluent (0.8 mL min<sup>-1</sup>).

**Table S2** The results of RAFT polymerization of PEGMEMA on the same plate for multiple usage.

| Times                                 | 1     | 2     | 3     | 4     | 5     |
|---------------------------------------|-------|-------|-------|-------|-------|
| Conv. <sup>a</sup> (%)                | 42.8  | 34.7  | 36.4  | 35    | 46.4  |
| $M_{n, GPC}^b$ (g mol <sup>-1</sup> ) | 59700 | 57800 | 52800 | 51800 | 63400 |
| $M_w/M_n^b$                           | 1.45  | 1.45  | 1.49  | 1.47  | 1.44  |

<sup>a</sup> Calculated by gravimetry.

<sup>b</sup> Measured by GPC using N, N-dimethylformamide (DMF) as a fluent (0.8 mL min<sup>-1</sup>).

**Table S3.** Characterization of polymers with different ratios of monomer units.

| Samples         | MAG : DMAEMA :<br>PEGMEMA | $M_n$ (g mol <sup>-1</sup> ) | $M_w/M_n$   |
|-----------------|---------------------------|------------------------------|-------------|
| <b>1-1 (P1)</b> | <b>100 : 20 : 80</b>      | <b>65100</b>                 | <b>1.52</b> |
| 1-2             | 100 : 30 : 70             | 47000                        | 1.55        |
| 1-3             | 100 : 40 : 60             | 118000                       | 1.39        |
| 1-4             | 100 : 50 : 50             | 60000                        | 1.35        |
| <b>2-1 (P2)</b> | <b>100 : 60 : 40</b>      | <b>89900</b>                 | <b>1.46</b> |
| 2-2             | 100 : 70 : 30             | 50300                        | 1.66        |
| <b>2-3 (P3)</b> | <b>100 : 80 : 20</b>      | <b>107300</b>                | <b>1.52</b> |
| 2-4             | 100 : 90 : 10             | 92100                        | 1.50        |
| <b>2-5 (P4)</b> | <b>100 : 100 : 100</b>    | <b>118300</b>                | <b>1.56</b> |
| 3-1             | 67 : 13 : 120             | 37000                        | 1.46        |
| 3-2             | 67 : 27 : 106             | 71900                        | 1.43        |
| 3-3             | 67 : 40 : 93              | 60500                        | 1.65        |
| 3-4             | 67 : 53 : 80              | 62700                        | 1.42        |
| 3-5             | 67 : 67 : 67              | 73100                        | 1.51        |
| 4-1             | 67 : 80 : 53              | 57200                        | 1.53        |
| 4-2             | 67 : 93 : 40              | 80200                        | 1.60        |
| 4-3             | 67 : 106 : 27             | 76900                        | 1.66        |
| 4-4             | 67 : 120 : 13             | 69200                        | 1.69        |
| 5-1             | 80 : 100 : 120            | 60800                        | 1.56        |
| 5-2             | 60 : 100 : 140            | 63400                        | 1.47        |
| 5-3             | 40 : 100 : 160            | 72400                        | 1.47        |
| 5-4             | 20 : 100 : 180            | 87900                        | 1.47        |
| 5-5             | 10 : 100 : 190            | 108000                       | 1.45        |

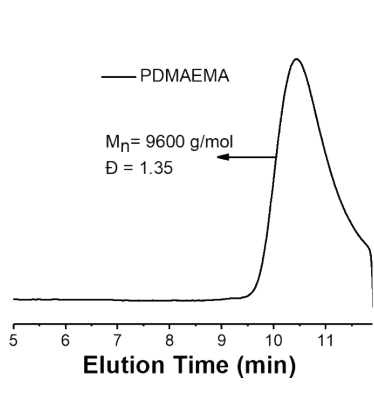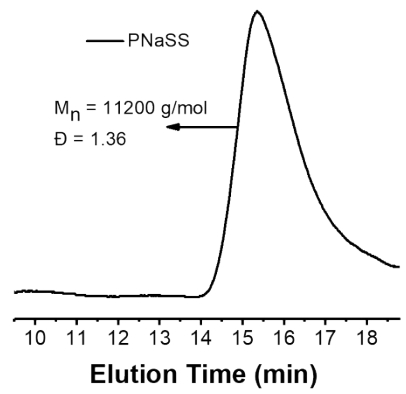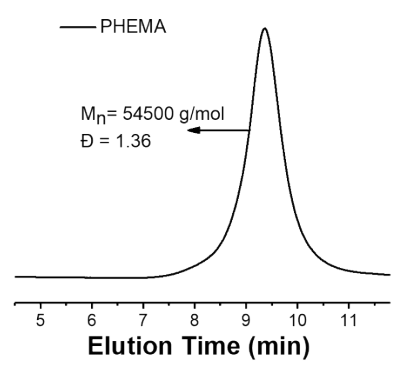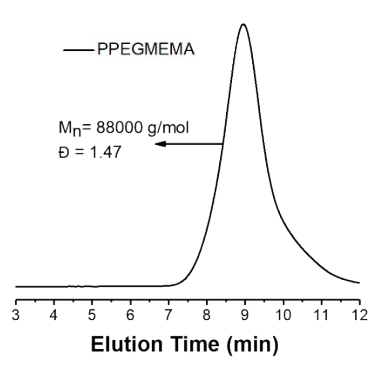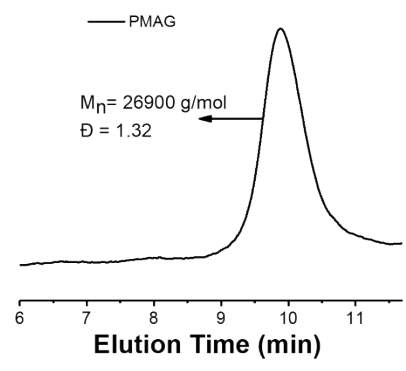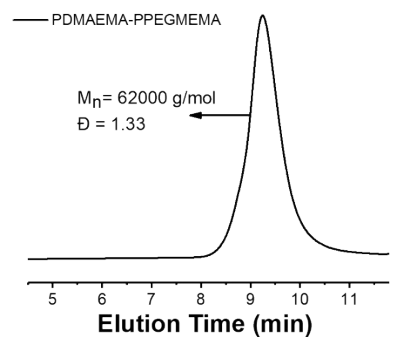

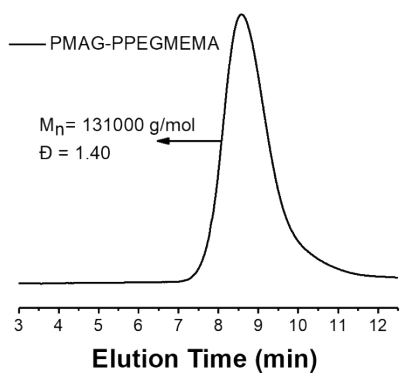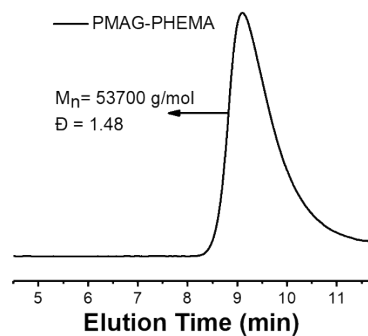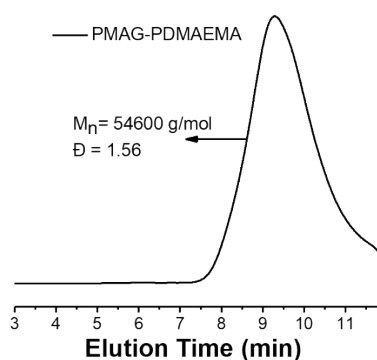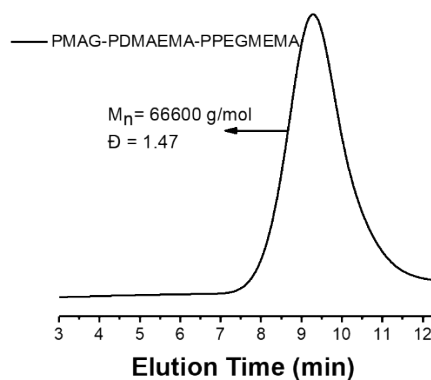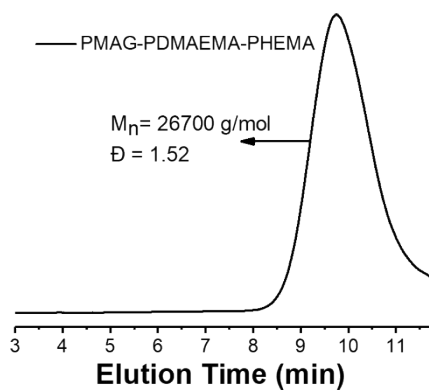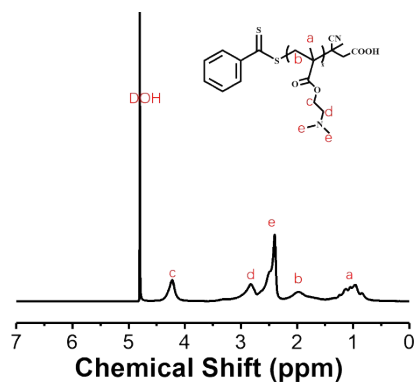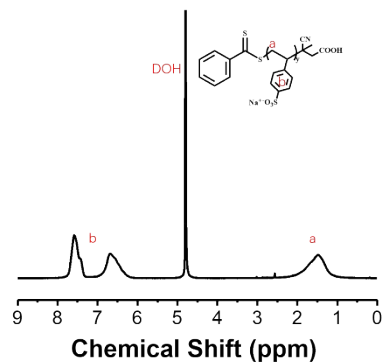

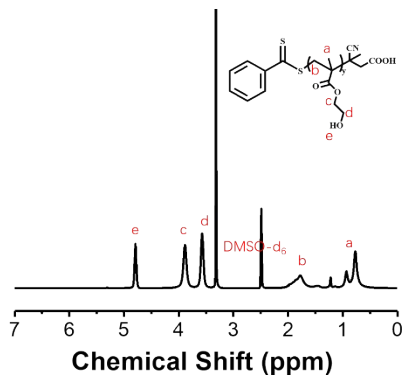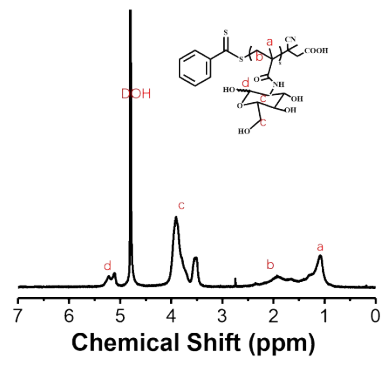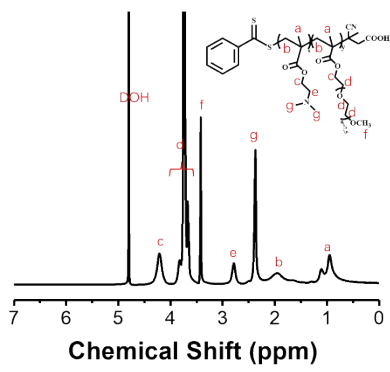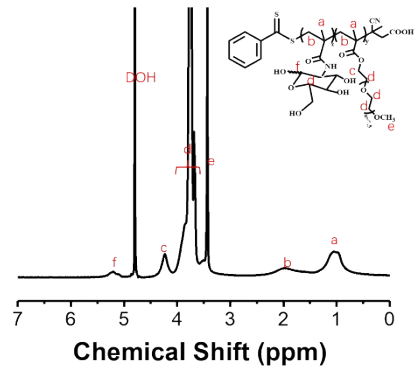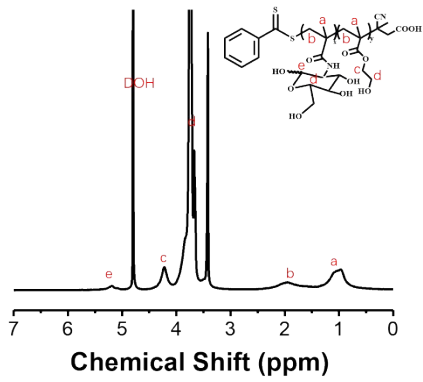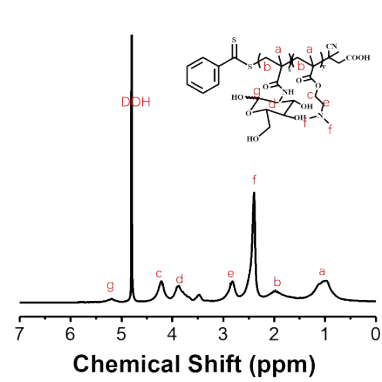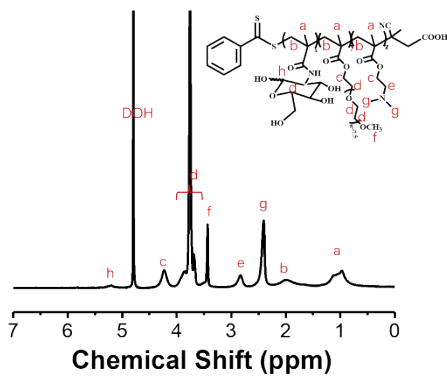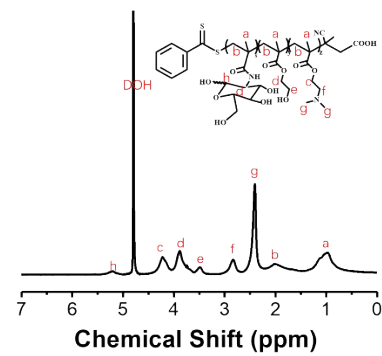

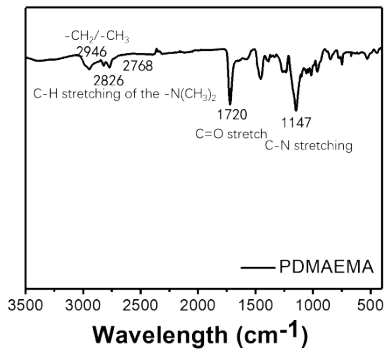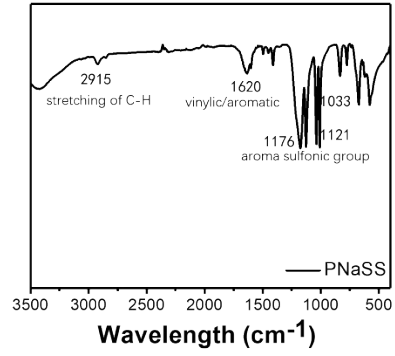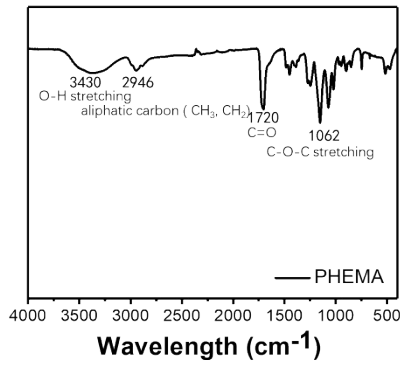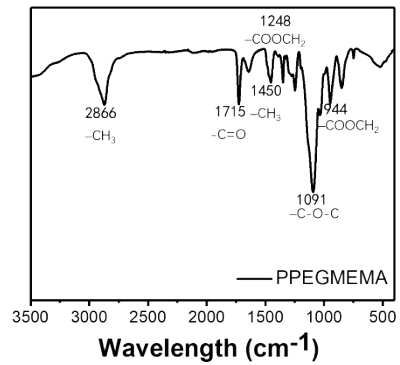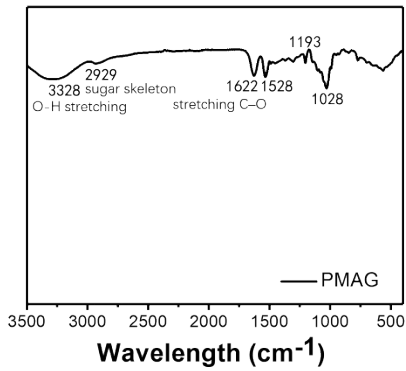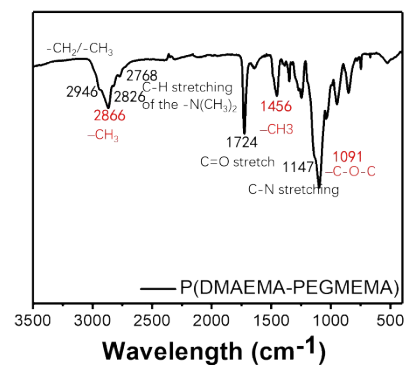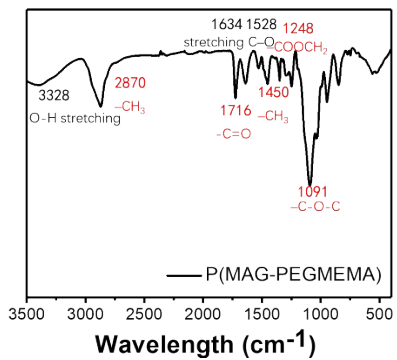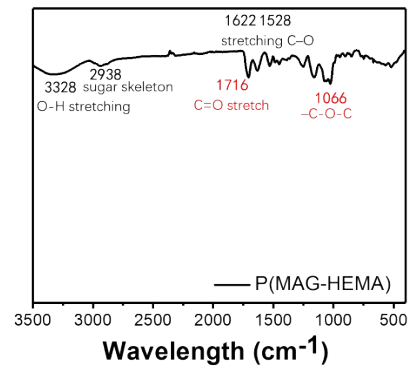

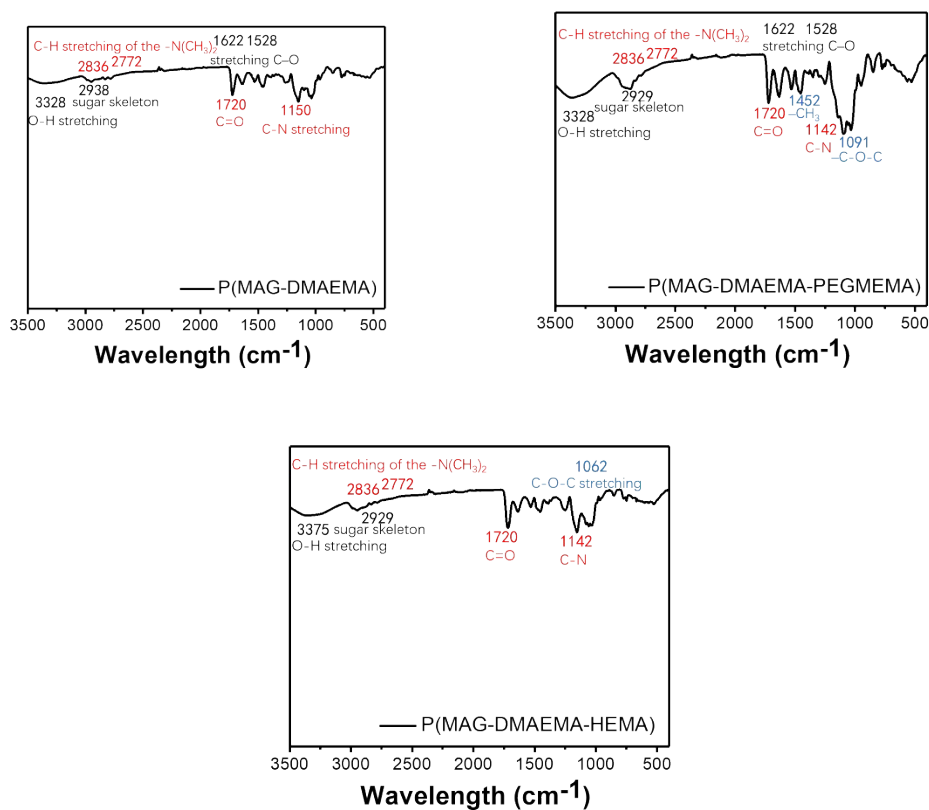

Fig. S2 GPC traces (DMF as the eluent), <sup>1</sup>HNMR, FTIR spectra of polymers from different monomers.

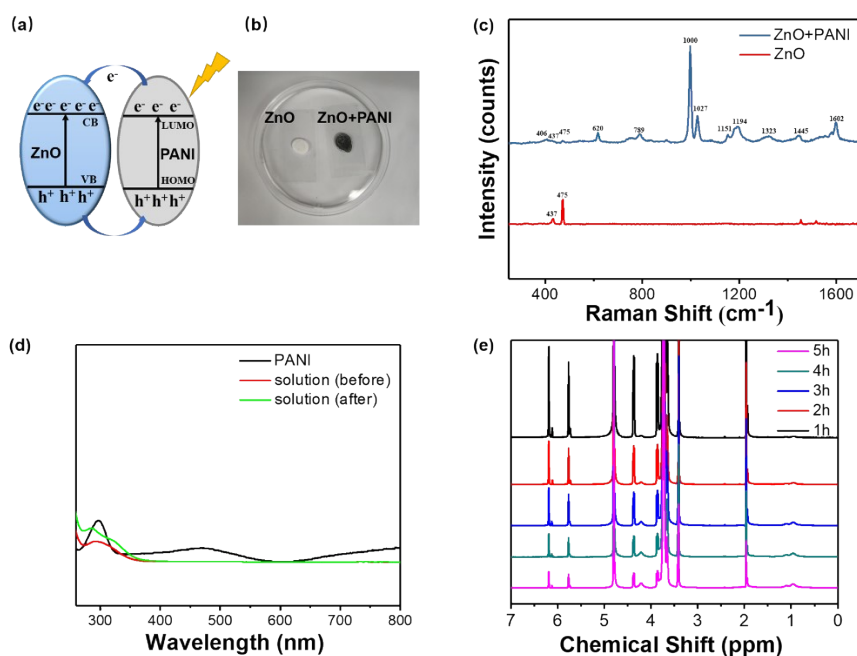

Fig. S3 (a) The schematic mechanism of the ZnO/PANI (polyaniline) photocatalyst; (b) The image of the film with ZnO and ZnO/PANI microreactors; (c) Raman spectra of ZnO and ZnO/PANI; (d) UV-vis absorption spectra of PANI and reaction solution (before and after); (e) The <sup>1</sup>HNMR spectra of polymers obtained at different polymerization time.

**Table S4** The experimental results of the loss of ZnO in the reaction media by ICP-OES.

| Sample <sup>a</sup> | Zn ( $\mu\text{g/mL}$ ) <sup>b</sup> | Average ( $\mu\text{g/mL}$ ) |
|---------------------|--------------------------------------|------------------------------|
| Trial 1             | 32.5 $\pm$ 4.5                       |                              |
| Trial 2             | 27.2 $\pm$ 3.2                       | 34.5 $\pm$ 7.3               |
| Trial 3             | 37.8 $\pm$ 3.7                       |                              |
| Trial 4             | 40.6 $\pm$ 3.8                       |                              |

<sup>a</sup> 600  $\mu\text{L}$  polymerization solution were conducted in the presence of oxygen at 25  $^{\circ}\text{C}$  under the irradiation of simulated sunlight after 8 hours in the 48 well-plates modified with 2mg ZnO nanoparticles.

<sup>b</sup> Zn content was calculated by three times for ICP-OES.

**Table S5** The results of RAFT polymerization of PEGMEMA using different amounts of PANI.

|                                               | 0.5mg | 1mg   | 1.5mg | 2mg   | 2.5mg | 3mg   |
|-----------------------------------------------|-------|-------|-------|-------|-------|-------|
| conv. <sup>a</sup> (%)                        | 20.3  | 33.8  | 43.9  | 47.1  | 41.2  | 36.6  |
| $M_{n, \text{GPC}}^b$ ( $\text{g mol}^{-1}$ ) | 30600 | 52700 | 59700 | 72500 | 70600 | 93200 |
| $\bar{D}$                                     | 1.42  | 1.46  | 1.54  | 1.48  | 1.48  | 1.67  |

<sup>a</sup> Calculated by gravimetry.

<sup>b</sup> Measured by GPC using N, N-dimethylformamide (DMF) as a fluent (0.8 mL min<sup>-1</sup>).

**Table S6** The results of RAFT polymerization of PEGMEMA under different light intensity.

| Light intensity ( $\text{mW/ cm}^2$ ) | time (h) | conv. <sup>a</sup> (%) | $M_{n, \text{th}}^b$ ( $\text{g mol}^{-1}$ ) | $M_{n, \text{GPC}}^c$ ( $\text{g mol}^{-1}$ ) | $\bar{D}^c$ |
|---------------------------------------|----------|------------------------|----------------------------------------------|-----------------------------------------------|-------------|
| 49                                    | 6        | 50.0                   | 47500                                        | 87800                                         | 1.47        |
| 39                                    | 6        | 33.9                   | 33300                                        | 51200                                         | 1.49        |
| 27                                    | 6        | 10.3                   | 9500                                         | 10900                                         | 1.31        |
| 23                                    | 6        | 6.8                    | 5900                                         | 9300                                          | 1.22        |

<sup>a</sup> Calculated by gravimetry.

<sup>b</sup>  $M_{n, \text{th}} = \text{conversion} \times M \times [M]_0 / ([M_{\text{CPADB}}]_0 + M_{\text{CPADB}})$

<sup>c</sup> Measured by GPC using N, N-dimethylformamide (DMF) as a fluent (0.8 mL min<sup>-1</sup>)



**Table S7** The results of PEGMEMA obtained at the endpoint of RAFT polymerization using ZnO and ZnO/PANI in Figure 3c.

| condition | time (h) | conv. <sup>a</sup> (%) | $M_{n, th}^b$ (g mol <sup>-1</sup> ) | $M_{n, GPC}^c$ (g mol <sup>-1</sup> ) | $\bar{D}^c$ |
|-----------|----------|------------------------|--------------------------------------|---------------------------------------|-------------|
| ZnO       | 5        | 31                     | 29500                                | 76200                                 | 1.47        |
| ZnO/PANI  | 5        | 58                     | 55300                                | 97600                                 | 1.46        |

<sup>a</sup> Calculated by gravimetry.

<sup>b</sup>  $M_{n, th} = \text{conversion} \times M \times [M]_0 / ([M_{CPADB}]_0 + M_{CPADB})$ .

<sup>c</sup> Measured by GPC using N, N-dimethylformamide (DMF) as a fluent (0.8 mL min<sup>-1</sup>)

The polymerizations were conducted in the presence of oxygen at 25 °C under the irradiation of simulated sunlight.

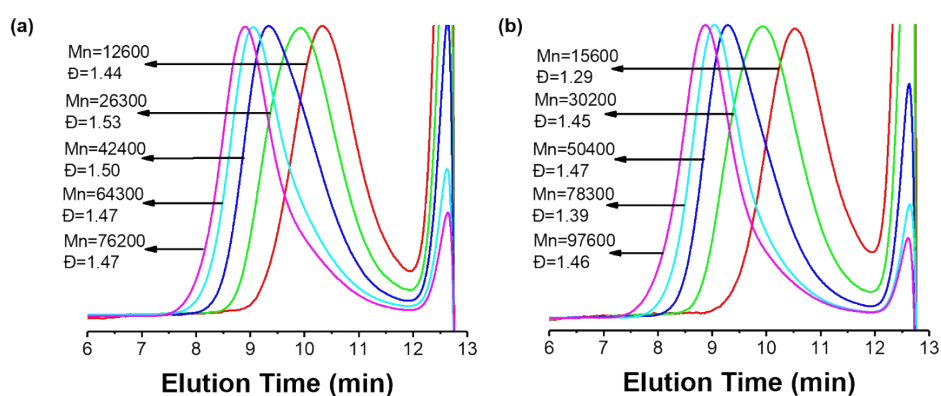

**Fig. S4** (a) GPC traces (DMF as the eluent) of the PEGMEMA in different reaction times under ZnO as photocatalyst condition; (b) GPC traces (DMF as the eluent) of the PEGMEMA in different reaction times as photocatalyst condition.

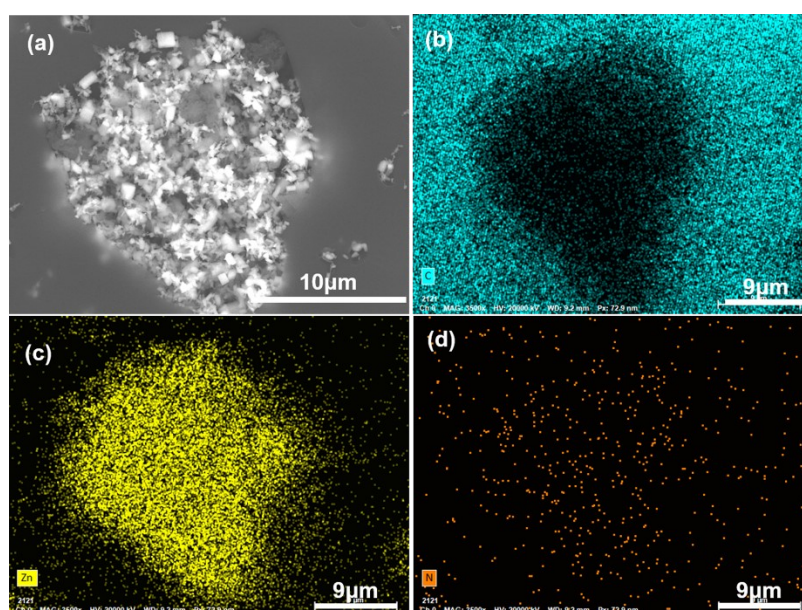

**Fig. S5** (a) SEM image of a single ZnO/PANI microreactor; (b) The C element content of the single microreactor; (c) The Zn element content of the single microreactor; (d) The N element content of the single microreactor.

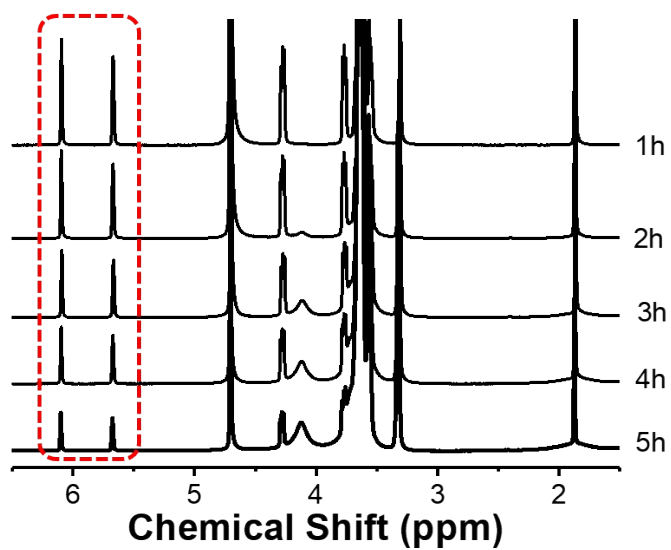

Fig. S6 <sup>1</sup>H NMR spectra of the outdoor polymerization at different time points.

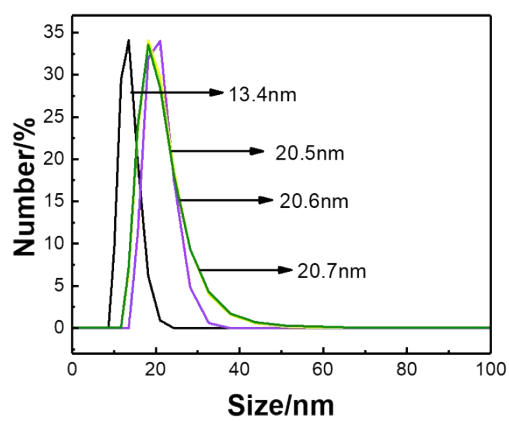

Fig. S7 DLS number distributions of the synthesized glycopolymers (P1, P2, P3 and P4). ( $C_{[M]} = 1 \text{ mg/mL}$ ).

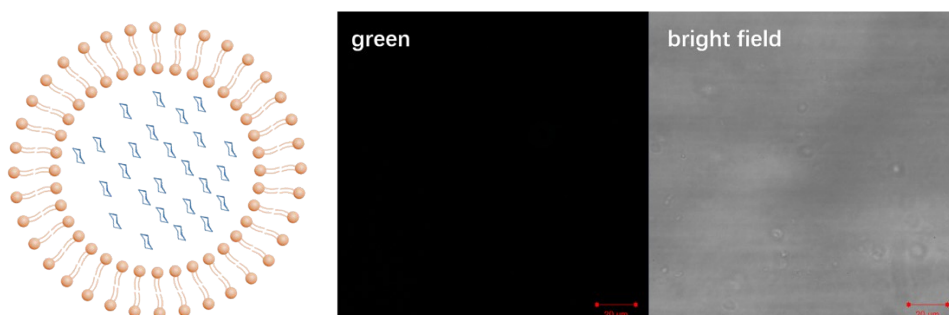

Fig. S8 Confocal images of ConA-uptake test for the vesicle with sugar monomer.

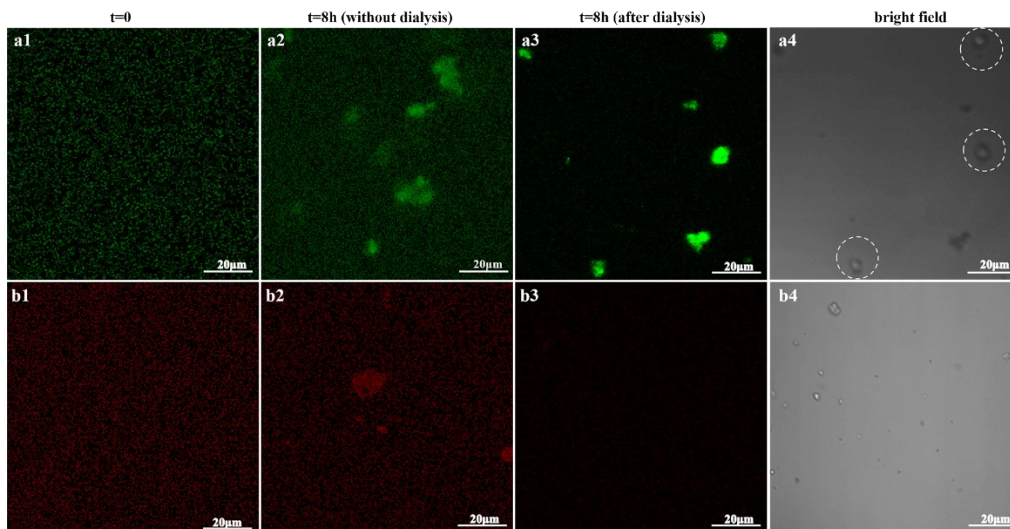

**Fig. S9** (a) Confocal images of artificial cells after incubation with FITC-ConA alone; (b) Confocal images of artificial cells after incubation with RBITC-BSA alone.

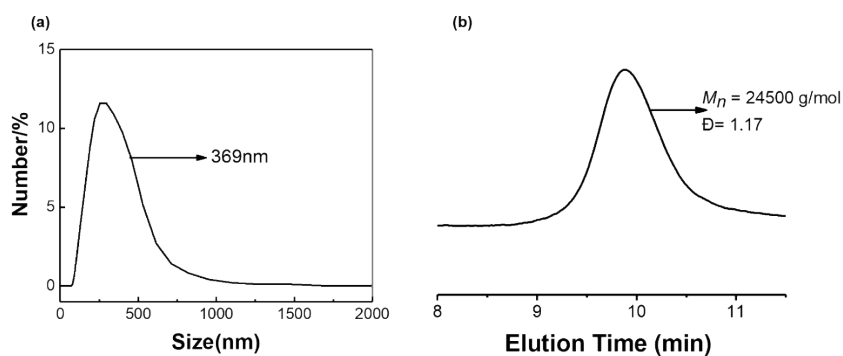

**Fig. S10** (a) DLS number distributions of the artificial cells; (b) GPC traces (DMF as the eluent) of the PMAG in the artificial cells.

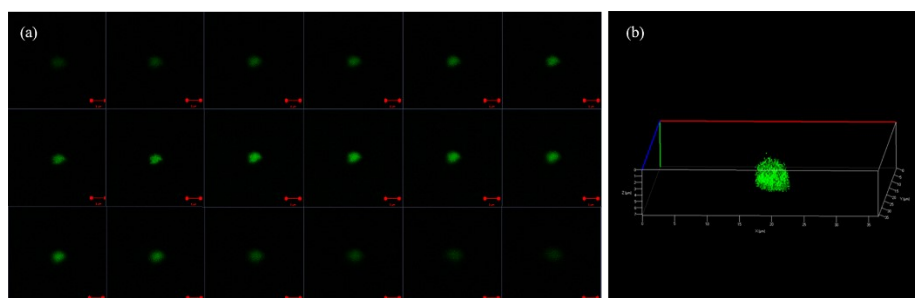

**Fig. S11** Z stack confocal Images of an artificial cell after up-taking FITC-ConA.

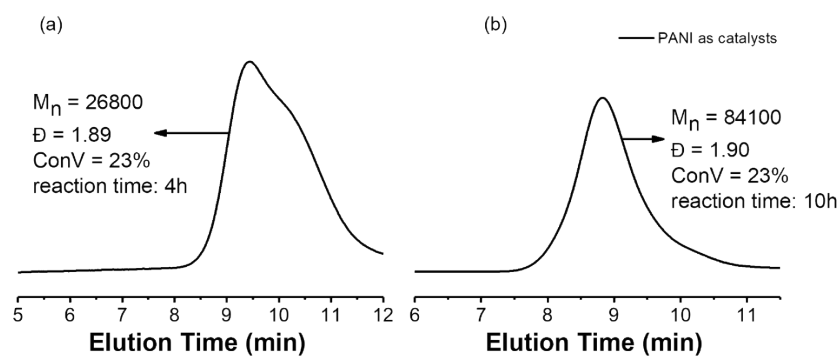

**Fig. S12 GPC traces of polymers in the control experiments.** (a) GPC traces (DMF as the eluent) of the PEGMEMA polymer obtained in the ZnO/PANI plate with a diameter of 3.5 cm; The polymerization is slower and PDI broader than that in 48-well plate because the solution was exposed to a larger area in the air and more oxygen. (b) GPC traces (DMF as the eluent) of the PEGMEMA polymer obtained in the 48-well plate with only PANI as photocatalyst. The polymerization is slow and not well-controlled without ZnO.
